# Supplementary material for: Secreted frizzled-related protein 4 promotes brown adipocyte differentiation
Source: PubMed Central journal article supplement — Exp Ther Med. 2021 Apr 15;21(6):637. doi: 10.3892/etm.2021.10069 (PMC8097229; doi:10.3892/etm.2021.10069), 2021-04-15
Supplement: Supplementary_Data.pdf [file Supplementary_Data.pdf]

Table SI. Sequences of the primers for reverse transcription-quantitative PCR.

| Gene           | Primer type | Sequence (5'-3')          |
|----------------|-------------|---------------------------|
| Adiponectin    | Reverse     | TTCTGTCTGTACGATTGTCAGTGG  |
|                | Forward     | GTCATCTTCGGCATGACTGG      |
| $\beta$ -actin | Reverse     | GCGGCATCCACGAAACTAC       |
|                | Forward     | TGATCTCCTTCTGCATCCTGTC    |
| C/EBP $\alpha$ | Reverse     | TTGAAGCACAATCGATCCATCC    |
|                | Forward     | GCACACTGCCATTGCACAAG      |
| C/EBP $\beta$  | Reverse     | ACCGGGTTTTCGGGACTTGA      |
|                | Forward     | CCC GCAGGAACATCTTTAAGTGA  |
| Cidea          | Reverse     | TGACATTCATGGGATTGCAGACTAA |
|                | Forward     | TCCAGCACCAGCGTAACCAG      |
| GLUT4          | Reverse     | TTCTTATTGCAGCGCCTGAGTC    |
|                | Forward     | CCAAGCACAGCTGAGAATACAGCTA |
| PGC-1 $\alpha$ | Reverse     | AGCCGTGACCACTGACAACGAG    |
|                | Forward     | GCTGCATGGTTCTGAGTGCTAAG   |
| PRDM16         | Reverse     | CGGAAGAGCGTGAGTACAAATG    |
|                | Forward     | TCCGTGAACACCTTGACACAGT    |
| PPAR $\gamma$  | Reverse     | GGAGCCTAAGTTTGAGTTTGCTGTG |
|                | Forward     | TGCAGCAGGTTGTCTTGGATG     |
| SFRP4          | Reverse     | AAGCCGACCCTGGCAACATA      |
|                | Forward     | TTGTGACCTCATTGCAACCACTC   |
| UCP-1          | Reverse     | CACTCAGGATTGGCCTCTACGAC   |
|                | Forward     | GCTCTGGGCTTGCATTCTGAC     |
